# Supplementary material for: Dual-functional RhNi nanocubes for coupling electrocatalytic water reduction and alcohol oxidation for energy-saving hydrogen production
Source: Royal Society of Chemistry journal article supplement (doi:10.1039/d5qi00011d), 2025-01-01
Supplement: d5qi00011d1.pdf [file d5qi00011d1.pdf]

**1 Dual-Functional RhNi Nanocubes Coupling the Electrocatalytic Water Reduction and Alcohol  
2 Oxidation for Energy-Saving Hydrogen Production**

3 Hui-Zi Huang,<sup>a</sup> Di Liu,<sup>a,b</sup> Zhejiayi Zhu,<sup>a</sup> Wenjing Tian,<sup>a</sup> Li-Wei Chen,<sup>a</sup> Jiani Li,<sup>a</sup> and An-Xiang Yin<sup>\*a</sup>

4 <sup>a</sup> Ministry of Education Key Laboratory of Cluster Science, Beijing Key Laboratory of Photoelectronic/Electrophotonic  
5 Conversion Materials, Advanced Technology Research Institute (Jinan), School of Chemistry and Chemical Engineering,  
6 Beijing Institute of Technology, Beijing 100081, P. R. China.

7 <sup>b</sup> Department of Pharmaceutical Engineering, School of Life and Health Sciences, Huzhou College, Huzhou 313000, P. R.  
8 China.

9 \* To whom correspondence should be addressed: yin@bit.edu.cn

10

## 11 1. Experimental section

### 12 1.1 Chemicals and materials

13 Rhodium acetylacetonate [Rh(acac)<sub>3</sub>, 99.99%, Alfa Aesar, USA], nickel acetylacetonate [Ni(acac)<sub>2</sub>, 97%, Aladdin, China],  
14 oleylamine (OAm, 80–90%, Aladdin, China), cetyltrimethylammonium bromide (CTAB, 99%, Aladdin, China), *L*-ascorbic  
15 acid (AA, 99%, Aladdin, China), carbon black (CB, Vulcan XC-72R, 99.9%, Carbot Co., USA), commercial Pt on carbon  
16 black (20% Pt/C, Alfa Aesar, USA), potassium hydroxide (KOH, 99.99%, Aladdin, China), ethanol (EtOH, 99.9%, Aladdin,  
17 China), ethylene glycol (EG, 99%, Alfa Aesar, USA), deuterated water (D<sub>2</sub>O, 99.9%, Aladdin, China), dimethyl sulfoxide  
18 (DMSO, ≥ 99.8%, Aladdin, China), Nafion solution (5 wt% in methanol and H<sub>2</sub>O, DuPont, USA), tetradecyl trimethyl  
19 ammonium bromide (TTAB, 99%, Meryer, China), and polyvinyl pyrrolidone (PVP, MW = 24000, Aladdin, China) were  
20 used as received without further purification. The ultrapure water (18.2 MΩ cm) used in all experiments was prepared by  
21 passing deionized water through an ultra-pure purification system (Milli-Q).

### 22 1.2 Preparation of Rh-based electrocatalysts

23 In a typical synthesis of Rh–Ni nanocubes (RhNi NCs), 0.02 mmol (5.14 mg) of Ni(acac)<sub>2</sub>, 0.04 mmol (14.6 mg) of CTAB,  
24 and 5 mL of OAm were added into a 50 mL three-necked flask. The solution was heated to 120 °C, kept for 30 min to obtain  
25 a homogeneous solution, and then further quickly heated to 250 °C under N<sub>2</sub> atmosphere. Then, Rh stock solution prepared  
26 by dissolving 0.04 mmol (16.0 mg) of Rh(acac)<sub>3</sub> and 0.08 mmol (14.0 mg) of AA in 1 mL of OAm at 60 °C was rapidly  
27 injected into the hot solution. The reaction mixture was kept at 250 °C for another 60 min and gradually turned black. Finally,  
28 the reaction mixture was cooled down to room temperature naturally, centrifuged, and washed by cyclohexane and ethanol  
29 three times. The as-obtained RhNi NCs were redispersed in cyclohexane to form a stable colloidal dispersion.

30 The synthesis of Rh–Ni nanospheres (RhNi NSs) followed the similar procedures of RhNi NCs except that no AA was  
31 added.

32 Rh nanoparticles (Rh NPs) were synthesized through a solvothermal method for comparison. Typically, 0.1 mmol of  
33 RhCl<sub>3</sub>·3H<sub>2</sub>O, 0.5 mmol of tetradecyl trimethyl ammonium bromide (TTAB), and 2 mmol of PVP (MW = 24000) were  
34 dissolved into 20 mL of EG solution and heated at 80 °C for 20 min to obtain a brown homogeneous solution. Then, the  
35 solution was heated at 185 °C for 1.5 h, the reaction product was centrifuged and then washed several times by plenty of  
36 ethanol and acetone. The as-obtained Rh NPs were redispersed in ethanol to further use.

### 37 1.3 Loading electrocatalysts on carbon supports

38 The high surface area Vulcan XC-72R carbon black was dispersed in cyclohexane and then sonicated in an ice bath for 30

39 min to ensure the formation of homogeneous suspension. Subsequently, the as-prepared colloidal dispersion of Rh-based  
40 catalysts were added dropwise to the carbon cyclohexane dispersion. The catalysts were further sonicated for 40 min in an ice  
41 bath and stirred for another 300 min. The resulting carbon-supported catalysts were collected by filtration and then dried in  
42 the oven, followed by calcination in the air atmosphere at 250 °C for 2 h to remove the surfactant. The mass loading of metals  
43 in the CB-supported catalysts was measured by inductively coupled plasma-optical emission spectroscopy (ICP-OES).

#### 44 1.4 Characterization

45 The X-ray diffraction (XRD) patterns were recorded on a Rigaku MiniFlex 600 diffractometer with a Cu K $\alpha$  X-ray radiation  
46 source ( $\lambda = 0.154056$  nm) at a scan rate of 10°·min<sup>-1</sup>. The transmission electron microscopy (TEM) images were conducted  
47 by a JEOL JEM-2100 transmission electron microscope. High-resolution TEM (HRTEM), energy-dispersive spectrometer  
48 (EDS), high angle annular dark-field scanning transmission electron microscopy (HAADF-STEM), and mapping/line-  
49 scanning were performed on a Talos F200X transmission electron microscope. The aberration-corrected high-angle annular  
50 dark-field scanning transmission electron microscopy (AC-HAADF-STEM) studies were obtained using an FEI Themis Z  
51 with double aberration correctors. The X-ray photoelectron spectroscopy (XPS) spectra were carried out on a Thermo Fisher  
52 ESCALAB 250 Xi XPS system with a monochromatic Al K $\alpha$  X-ray source. <sup>1</sup>H nuclear magnetic resonance (NMR) spectra  
53 were performed on a Bruker Ascend 400 (400 MHz) spectrometer. ICP-OES studies were performed on an Agilent ICP-OES  
54 720 spectrometer. *In situ* Fourier transform infrared spectroscopy (FTIR) experiments were conducted on a Nicolet iS50 FTIR  
55 spectrometer equipped with an MCT detector cooled with liquid nitrogen. The spectral resolution was set to 8 cm<sup>-1</sup>, and 64  
56 interferograms were co-added for each spectrum. A reference spectrum was acquired at 0.10 V vs. RHE. The sample spectra  
57 were recorded during the chronopotentiometry tests with the anodic potential increased from 0.2 to 1.1 V vs. RHE in the step  
58 of 0.10 V. All gas chromatography (GC) experiments were performed on an online GC-2014C (SHIMADZU, Japan).

#### 59 1.5 Electrode preparation and electrochemical measurements in three-electrode system

60 General electrochemical hydrogen evolution reaction (HER) and ethanol oxidation reaction (EOR) were carried out in a three-  
61 electrode system. A platinum plate (1 × 1 cm<sup>2</sup>) and a saturated calomel electrode (SCE) were used as the counter electrode  
62 and reference electrode, respectively. Electrochemical measurements were conducted on an electrochemical workstation (CHI  
63 660E, China) at room temperature. All potentials were measured against the SCE and converted to the reversible hydrogen  
64 electrode (RHE) reference scale.

65 To prepare working electrodes, 1 mg of the CB-supported catalyst powder and 10  $\mu$ L of 5 wt% Nafion solution were  
66 dispersed in the mixture of 700  $\mu$ L of ethanol and 290  $\mu$ L of H<sub>2</sub>O to form a homogeneous ink after 0.5 h of sonication in ice

67 bath. Then the prepared ink was quantitatively dropped onto glassy carbon electrode (5 mm in diameter, PINE instruments)  
68 and used as the working electrode.

69 The HER measurements were conducted in 1.0 M KOH solution. The linear sweep voltammetry (LSV) measurements  
70 for HER were carried out at  $5 \text{ mV s}^{-1}$  with 95% iR compensation. The Tafel slopes were obtained from the LSV curves. The  
71 electrochemical impedance spectroscopy (EIS) of the samples for HER was recorded with AC voltage at  $-0.017 \text{ V}$  vs. RHE  
72 from  $0.1 \text{ Hz}$  to  $10^5 \text{ Hz}$  in  $1.0 \text{ M KOH}$ . The chronopotentiometry test for HER was performed at a current density of  
73  $10 \text{ mA cm}^{-2}$ .

74 The EOR performance were tested in ( $0.1 \text{ M KOH} + 1.0 \text{ M EtOH}$ ) solution during  $0 \sim 1.087 \text{ V}$  at  $50 \text{ mV s}^{-1}$ . The EIS  
75 for EOR was recorded with AC voltage at  $0.750 \text{ V}$  vs. RHE from  $0.1 \text{ Hz}$  to  $10^5 \text{ Hz}$  in the mixture of  $0.1 \text{ M KOH}$  and  $1.0 \text{ M}$   
76  $\text{EtOH}$ . The chronoamperometric test for EOR was carried out at  $0.6 \text{ V}$  vs. RHE.

#### 77 *1.6 Electrode preparation and electrochemical measurements in two-electrode system*

78 The two-electrode H-type cell was constructed for the coupled HER/EOR electrocatalysis using  $1.0 \text{ M KOH}$  as catholyte and  
79 ( $1.0 \text{ M KOH} + 1.0 \text{ M EtOH}$ ) solution as anolyte. To prepare working electrodes,  $4 \text{ mg}$  of the CB-supported catalyst powder  
80 and  $10 \text{ }\mu\text{L}$  of  $5 \text{ wt\%}$  Nafion solution were dispersed in the mixture of  $280 \text{ }\mu\text{L}$  of ethanol and  $110 \text{ }\mu\text{L}$  of  $\text{H}_2\text{O}$  to form a  
81 homogeneous ink after  $0.5 \text{ h}$  of sonication at room temperature. Then the prepared ink was quantitatively loaded onto a  $1 \times$   
82  $1 \text{ cm}^2$  carbon paper dropwise to achieve a mass loading of  $0.1 \text{ mg}_{\text{Rh}} \text{ cm}^{-2}$  and used as the anode and cathode electrodes. The  
83 scanning rate of the LSV curves were  $5 \text{ mV s}^{-1}$ . The chronopotentiometry test for the coupled HER/EOR was performed at a  
84 current density of  $10 \text{ mA cm}^{-2}$  and  $50 \text{ mA cm}^{-2}$ .

85 The configurations for coupling HER with the methanol oxidation reaction ( $\text{HER} \parallel \text{MOR}$ ), glycerol oxidation reaction  
86 ( $\text{HER} \parallel \text{GOR}$ ), and ethylene glycol oxidation reaction ( $\text{HER} \parallel \text{EGOR}$ ) were similar to the  $\text{HER} \parallel \text{EOR}$ , except for using  
87 different alcohols (*i.e.*, methanol, glycerol, and ethylene glycol).

#### 88 *1.7 Product analysis*

89 The liquid products were characterized by  $^1\text{H}$  NMR spectra. Typically,  $1 \text{ mL}$  of  $\text{D}_2\text{O}$  and  $10 \text{ }\mu\text{L}$  of DMSO were mixed to  
90 obtain solution A, then  $55 \text{ }\mu\text{L}$  of solution A was measured and diluted with  $2.3 \text{ mL}$  of  $\text{D}_2\text{O}$  to prepare an internal standard  
91 solution ( $250 \text{ ppm}$ ).  $500 \text{ }\mu\text{L}$  of the extracted electrolyte after electrolysis was mixed with  $100 \text{ }\mu\text{L}$  of internal standard solution.

92 The Faradaic efficiency (*FE*) value of each product was calculated by dividing the charge consumption for corresponding  
93 product with the total charge passing through the circuit during the electrolysis reaction. The *FE* of  $\text{CH}_3\text{COO}^-$  was calculated  
94 from the equation below:

$$FE_{\text{liquid}} (\%) = V \times c \times \frac{nF}{Q}$$

where  $V$  is the volume of the electrolyte in the anodic cell (mL);  $c$  is the concentration of liquid product after electrolysis, determined by  $^1\text{H}$  NMR ( $\text{mol mL}^{-1}$ );  $n$  is the number of transferred electrons for certain product (for  $\text{CH}_3\text{COO}^-$ ,  $n = 4$ );  $F$  is the Faradaic constant ( $96485 \text{ C mol}^{-1}$ );  $Q$  is the total charge consumed in the electrolysis (C).

The gaseous product ( $\text{H}_2$ ) from the cathodic compartment during the electrolysis of coupled HER/EOR was collected and measured via the water displacement method. The  $\text{H}_2$  was also quantitatively analyzed by GC, using  $\text{N}_2$  as the carrier gas. Their  $FE$  was calculated as follows:

$$FE_{\text{H}_2} (\%) = C \times V \times \frac{nFP}{RTi}$$

where  $C$  is the concentration of the gas product ( $\text{H}_2$ ) measured by GC (ppm),  $V$  is the flow rate of  $\text{N}_2$  ( $\text{mL min}^{-1}$ ),  $n$  is the number of transferred electrons for certain product (for  $\text{H}_2$ ,  $n = 2$ ),  $F$  is the Faradaic constant ( $96485 \text{ C mol}^{-1}$ ),  $P$  is the ambient pressure ( $P = 101.325 \text{ KPa}$ ),  $T$  is the room temperature ( $T = 298 \text{ K}$ ),  $R$  is the gas constant ( $R = 8.314 \text{ J mol}^{-1} \text{ K}^{-1}$ ), and  $i$  is the total current during a constant-current electrolysis ( $i = 10 \text{ mA}$ ).

### 1.8 DFT calculations

Density functional theory (DFT) calculations were performed in the Vienna ab initio simulation package (VASP). A spin-polarized generalized gradient approximation (GGA) Perdew-Burke-Ernzerhof (PBE) functional was adopted to calculate the exchange-correlation interaction.<sup>1,2</sup> The projector augmented wave (PAW) method with a cutoff energy of 400 eV was used for the plane wave basis, and  $3 \times 3 \times 1$  (for {100}) and  $3 \times 2 \times 1$  (for {111})  $\Gamma$ -centered k-mesh in the Brillouin zone were applied for the k-space integration.<sup>3,4</sup> A climbing image nudged elastic band (CI-NEB) method implemented in VASP was used to locate the transition states for reaction energy barrier simulation.<sup>5</sup>

The Gibbs free energy change ( $\Delta G$ ) for adsorptions was calculated by the following equation:

$$\Delta G = \Delta E + \Delta E_{\text{ZPE}} - T\Delta S$$

where  $\Delta E_{\text{ZPE}}$  is the zero-point energy change,  $\Delta S$  is the entropy change, and  $T$  is temperature at 298.15 K.

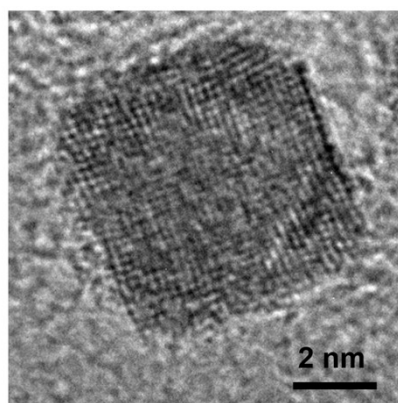

119  
120 **Fig. S1.** HRTEM image of one RhNi NC.  
121

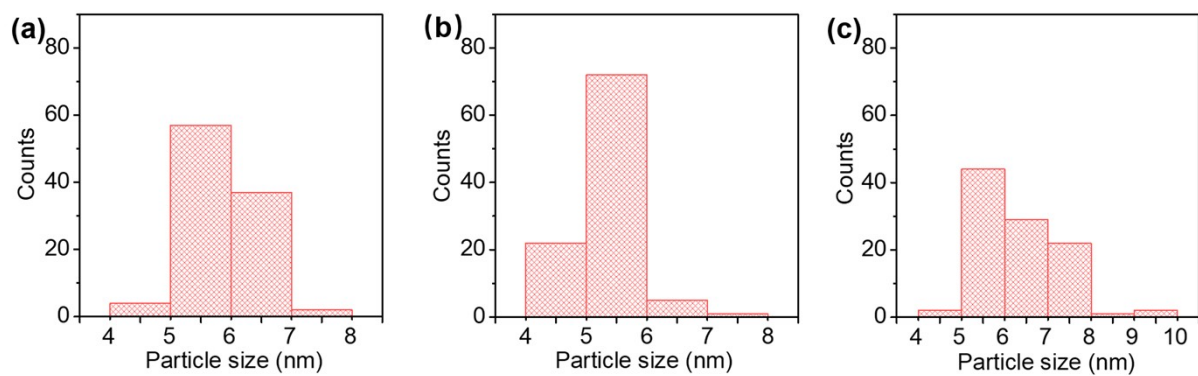

**Fig. S2.** The histograms of particle size distributions. (a) RhNi NCs, (b) RhNi NSs, and (c) Rh NPs.

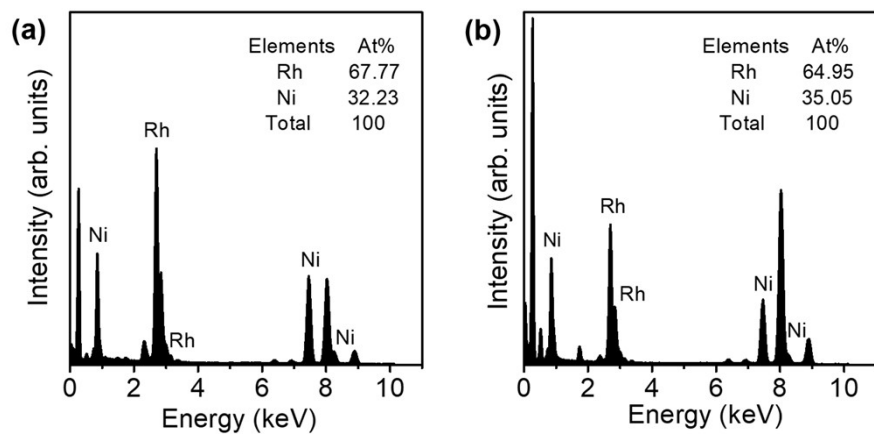

125  
 126 **Fig. S3.** Elemental analysis by EDS. (a) RhNi NCs and (b) RhNi NSs.  
 127



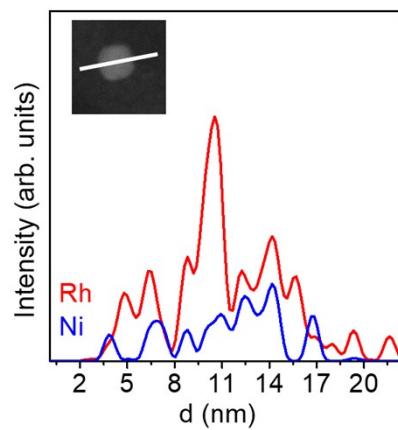

128

129 **Fig. S4.** HAADF-STEM image and corresponding EDS line scanning profile of one RhNi NC.

130

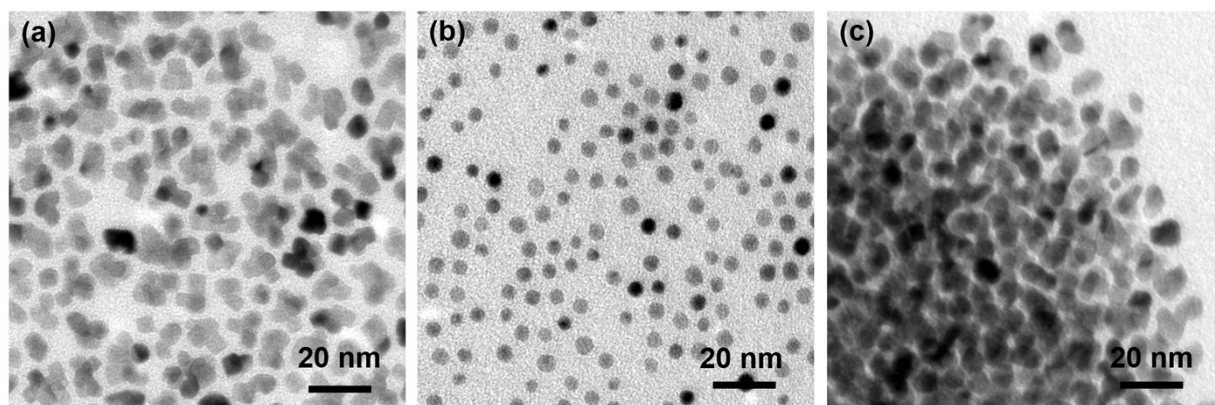

131  
132 **Fig. S5.** TEM images of the RhNi nanocrystals synthesized by using different amounts of CTAB or KBr. (a) 0.01 mmol of  
133 CTAB, (b) 0.16 mmol of CTAB, and (c) 0.08 mmol of KBr.  
134

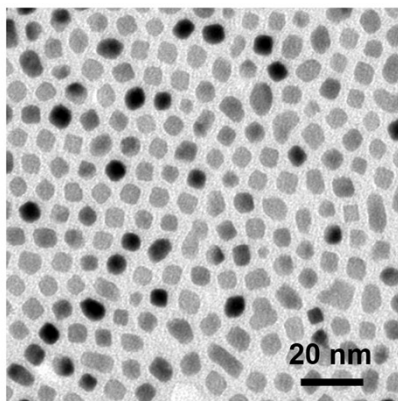

135

136 **Fig. S6.** TEM image of the RhNi nanocrystals synthesized by using 0.16 mmol of AA.

137

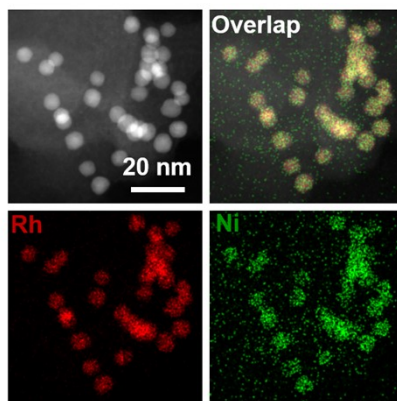

138  
 139 **Fig. S7.** HAADF-STEM image and the corresponding EDS elemental mapping of RhNi NSs.  
 140

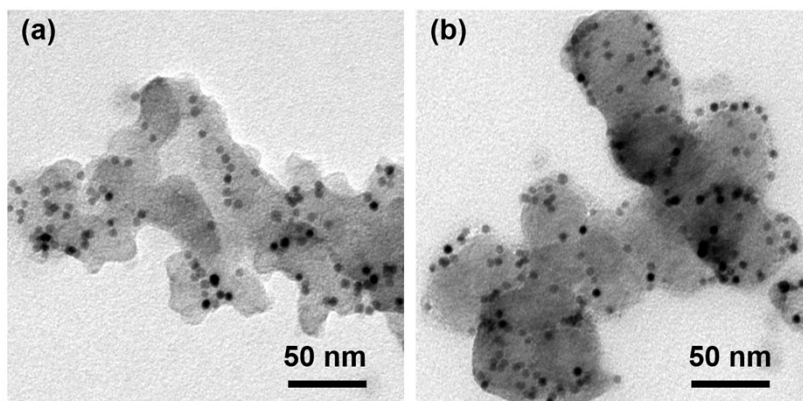

141  
142 **Fig. S8.** TEM images of Rh NPs supported on carbon black.

143

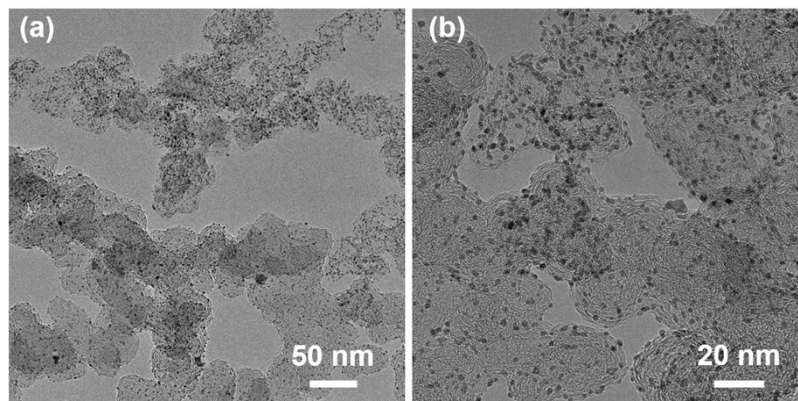

144

145 **Fig. S9.** TEM images of the commercial Pt/C.

146

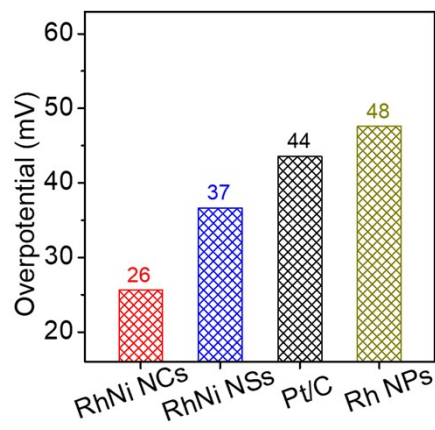

147

148 **Fig. S10.** Overpotentials for HER (at 10 mA cm<sup>-2</sup>) on RhNi NCs, RhNi NSs, Rh NPs, and commercial Pt/C.

149

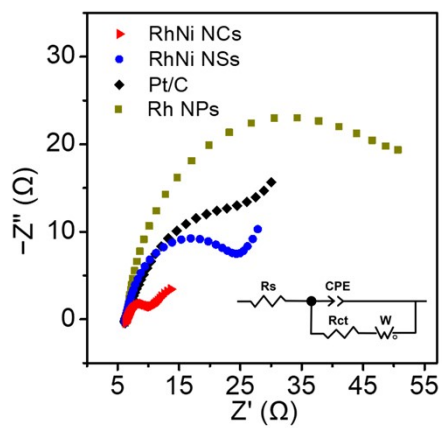

150

151 **Fig. S11.** Nyquist plots of RhNi NCs, RhNi NSs, Rh NPs, and commercial Pt/C in 1.0 M KOH.

152



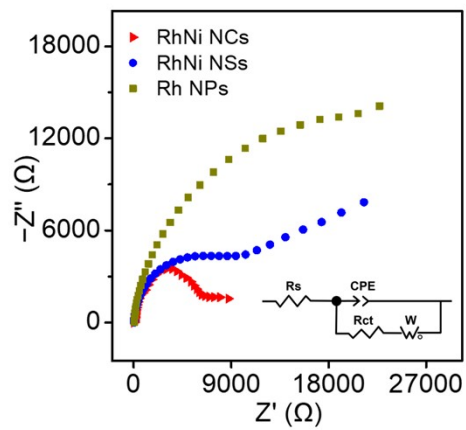

153

154 **Fig. S12.** Nyquist plots of RhNi NCs, RhNi NSs, and Rh NPs in the solution of 0.1 M KOH + 1.0 M C<sub>2</sub>H<sub>5</sub>OH.

155

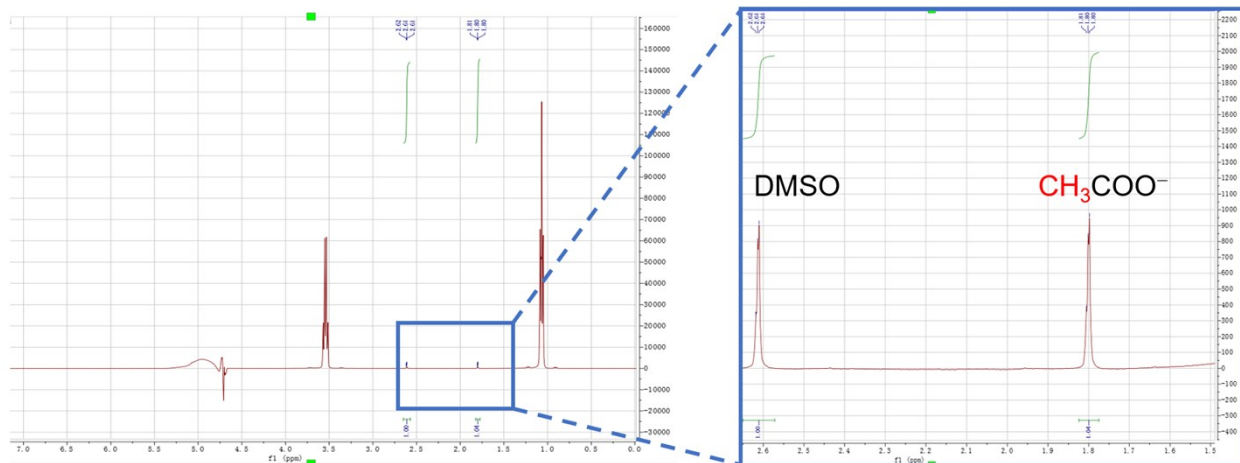

**Fig. S13.** The typical  $^1\text{H}$  NMR profile of the residual electrolyte after 10000 s of EOR on RhNi NCs.

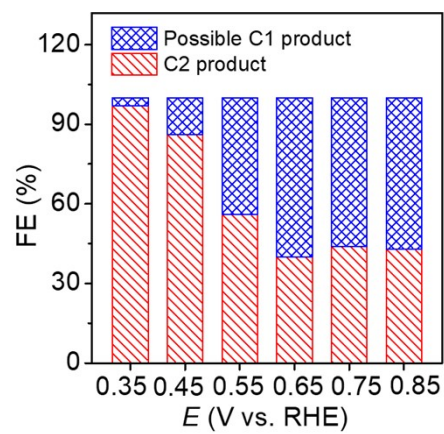

159

160 **Fig. S14.** FE for electrocatalytic products of EOR on RhNi NCs at different potentials.

161

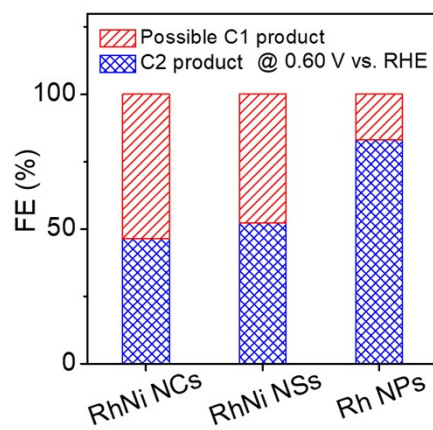

162

163 **Fig. S15.** FE of possible C1 and C2 products for EOR on RhNi NCs, RhNi NSs, and Rh NPs at 0.6 V vs. RHE.

164

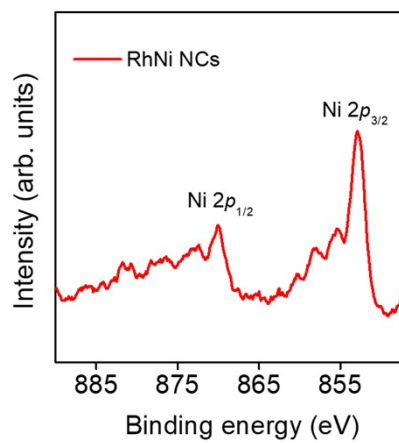

165

166 **Fig. S16.** Ni 2*p* XPS spectra of RhNi NCs.

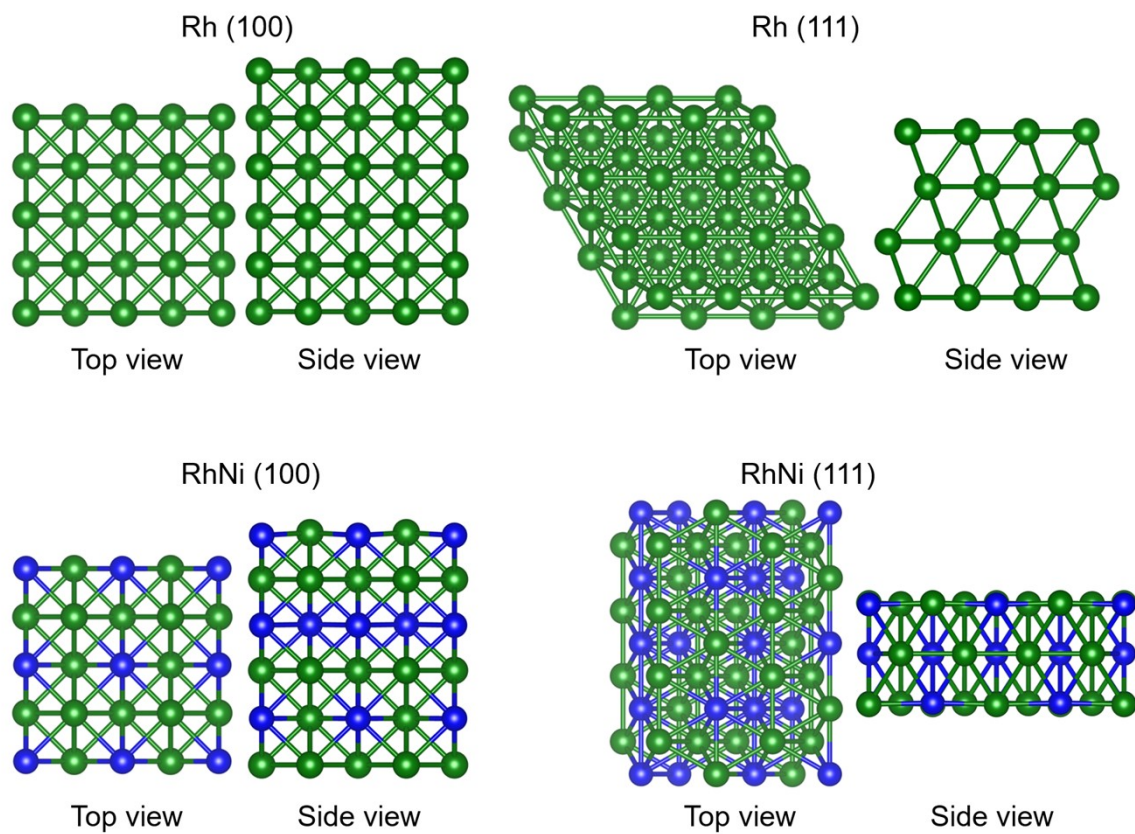

168

169 **Fig. S17.** Crystal structure models of Rh (100), Rh (111), RhNi (100), and Rh (111).

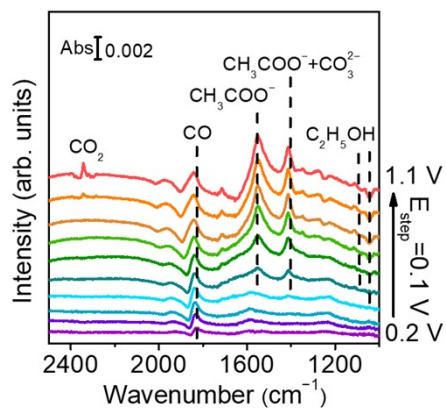

171  
 172 **Fig. S18.** *In situ* FTIR for EOR on RhNi NSs in the mixed electrolytes of 0.1 M KOH and 1.0 M EtOH at different potentials  
 173 varying from 0.2 to 1.1 V vs. RHE with an interval of 0.1 V.

174

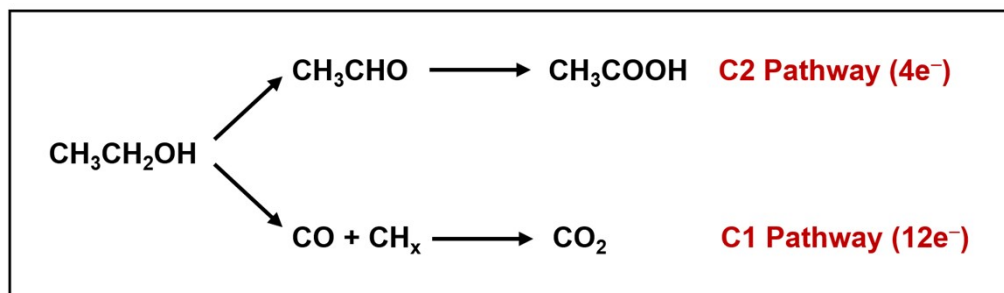

175

176 **Fig. S19.** Simplified schematic illustration for the dual-pathway mechanism of EOR.

177



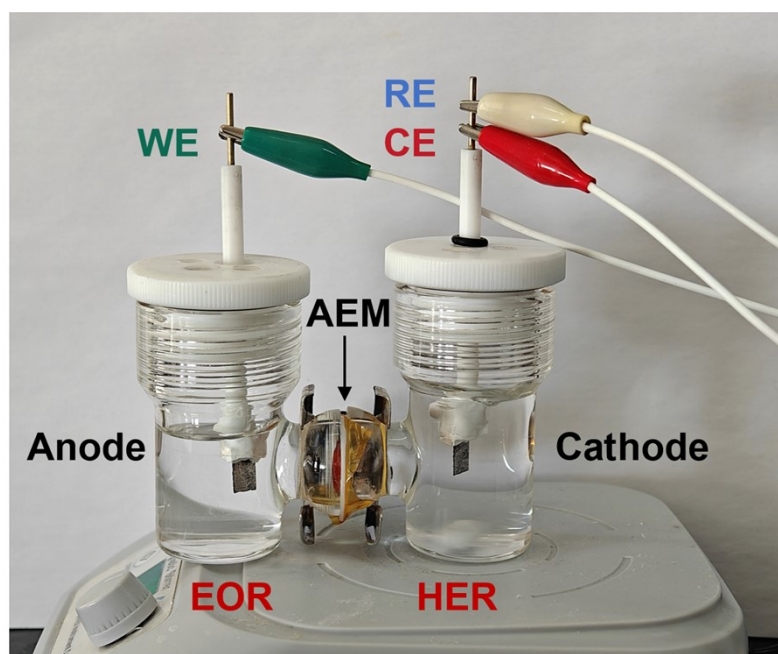

178  
179 **Fig. S20.** Digital photograph of the two-electrode cell electrolyzer using RhNi NCs as both anodic and cathodic catalysts.  
180

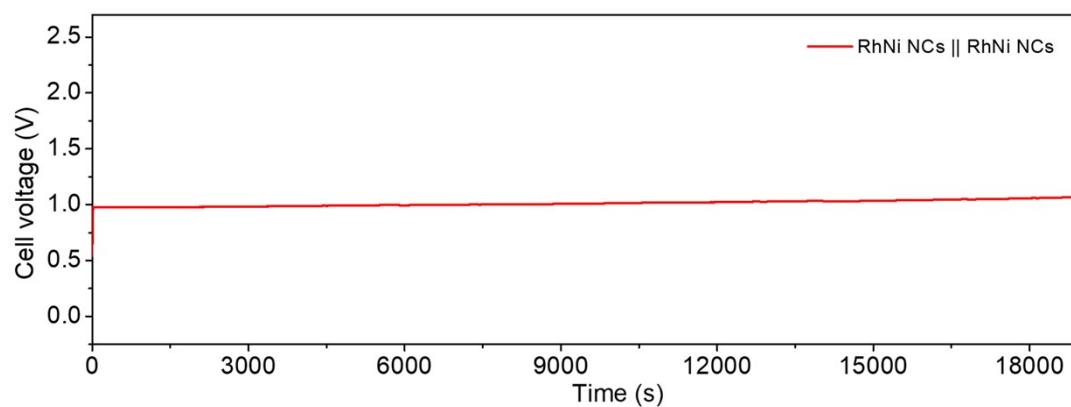

181  
 182 **Fig. S21.** The chronopotentiometry curves at 50 mA cm<sup>-2</sup> for coupled HER and EOR with symmetric electrodes using RhNi  
 183 NCs || RhNi NCs catalysts.  
 184

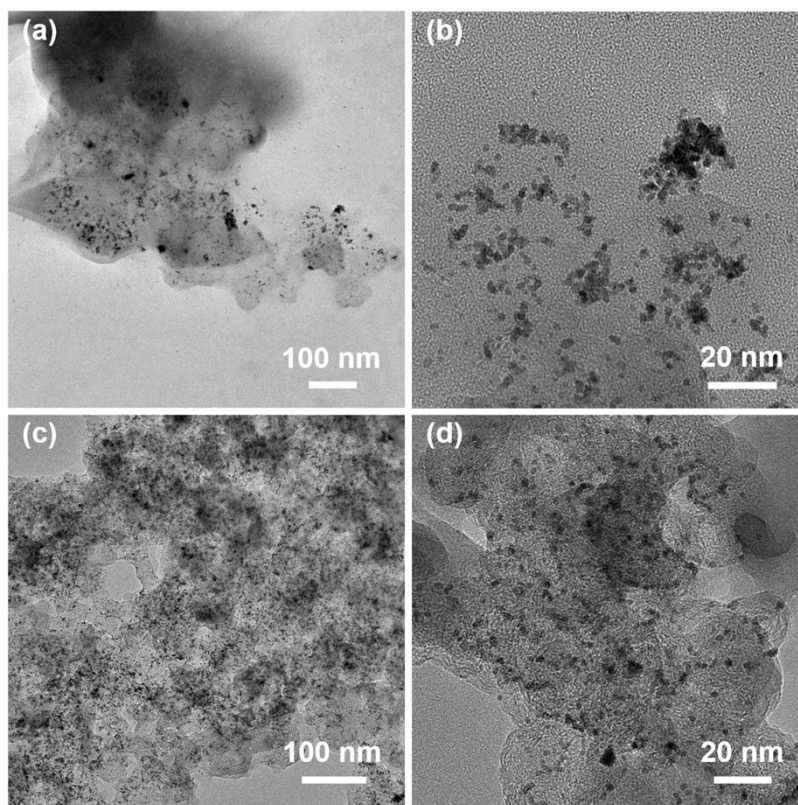

185

186 **Fig. S22.** TEM images of Pt/C after 8 hours of chronopotentiometry test for HER/EOR in (1.0 M KOH + 1.0 M C<sub>2</sub>H<sub>5</sub>OH)

187 solution at (a,b) anode and (c,d) cathode.

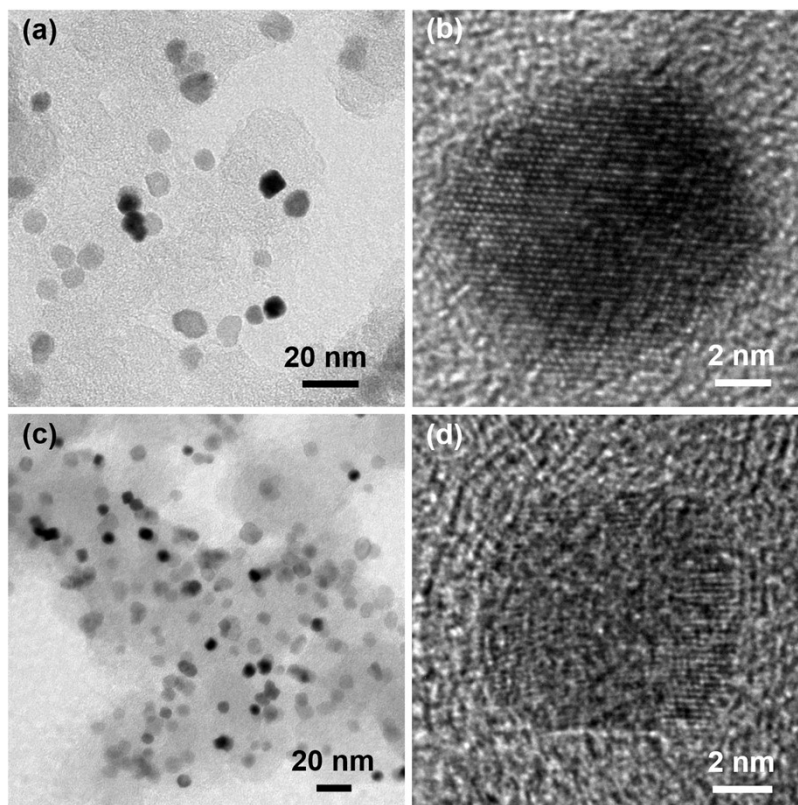

189

190 **Fig. S23.** TEM images of RhNi NCs after 8 hours of chronopotentiometry test for HER/EOR in (1.0 M KOH + 1.0 M  
 191 C<sub>2</sub>H<sub>5</sub>OH) at (a,b) anode and (c,d) cathode.

192

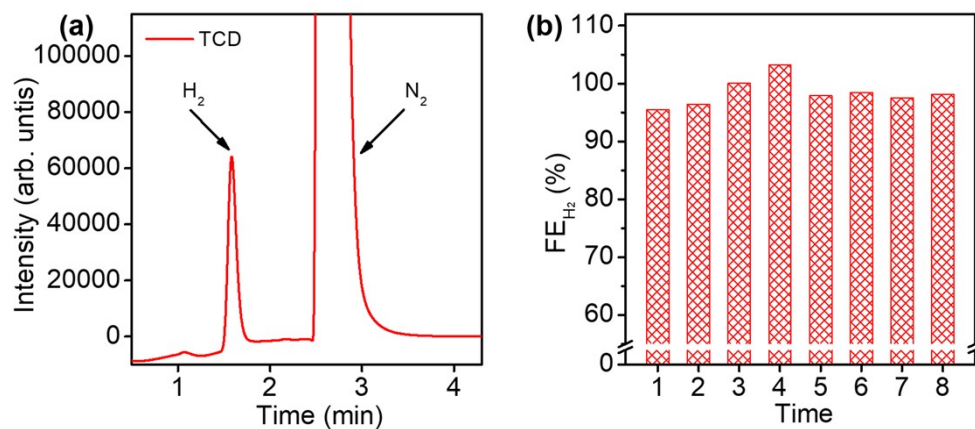

193

194 **Fig. S24.** Quantification of  $H_2$  produced at the cathode in the coupled HER || EOR cell. (a) Representative GC profiles for the  
 195 gaseous products during coupled HER/EOR electrolysis at  $10 \text{ mA cm}^{-2}$  and (b) the corresponding FE values for the generation  
 196 of  $H_2$  in the cathodic cell at different times on RhNi NCs.

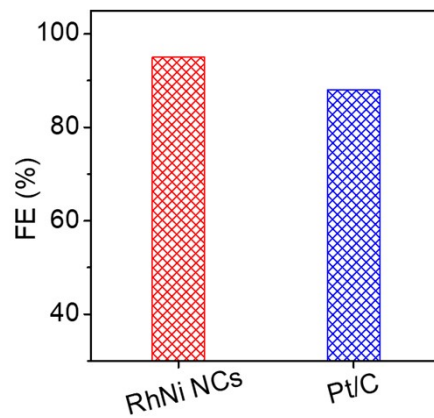

198

199 **Fig. S25.** FE of acetate product for HER/EOR in the anodic cell after 8 h amperometric i-t test on RhNi NCs and commercial  
200 Pt/C.

201

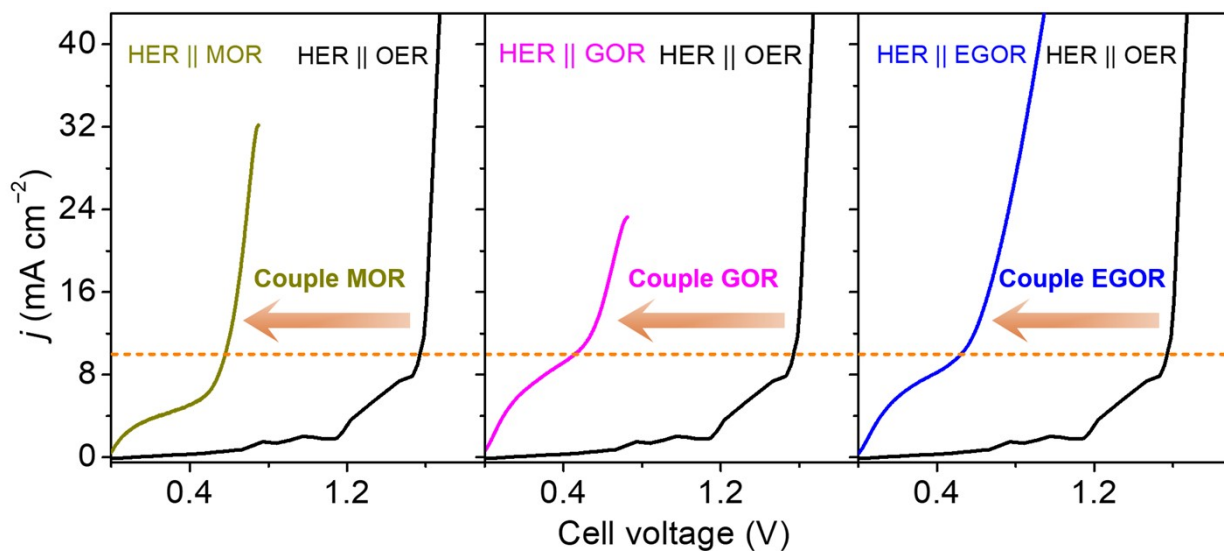

202

203 **Fig. S26.** LSV curves in the two-electrode cell electrolyzer using RhNi NCs as both cathodic and anodic catalysts for coupled  
 204 HER and various alcohol oxidation tests (methanol, glycerol, and ethylene glycol) in 1.0 M KOH || (1.0 M KOH + 1.0 M  
 205 alcohols) or for coupled HER and OER test in 1.0 M KOH || 1.0 M KOH.

206

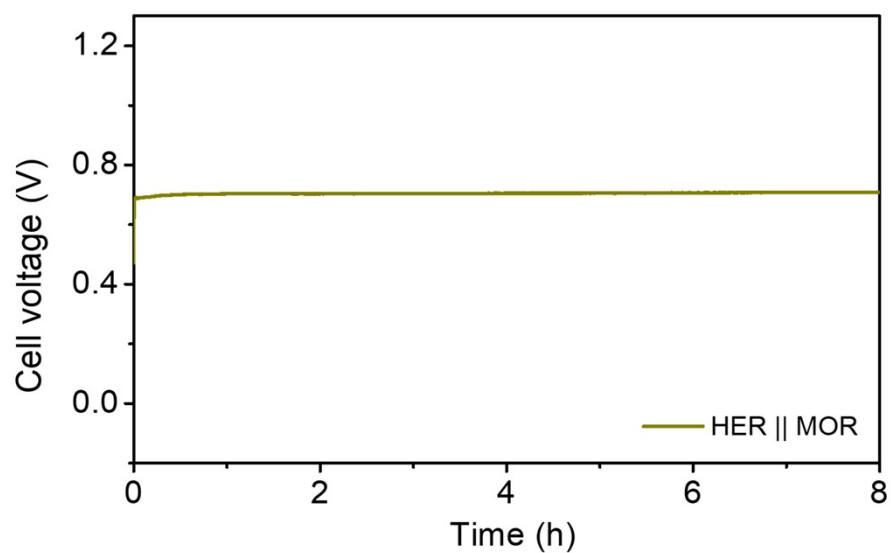

207

208 **Fig. S27.** The chronopotentiometry curves at  $10 \text{ mA cm}^{-2}$  for coupled HER and MOR with symmetric electrodes using RhNi  
209 NCs || RhNi NCs catalysts.

210



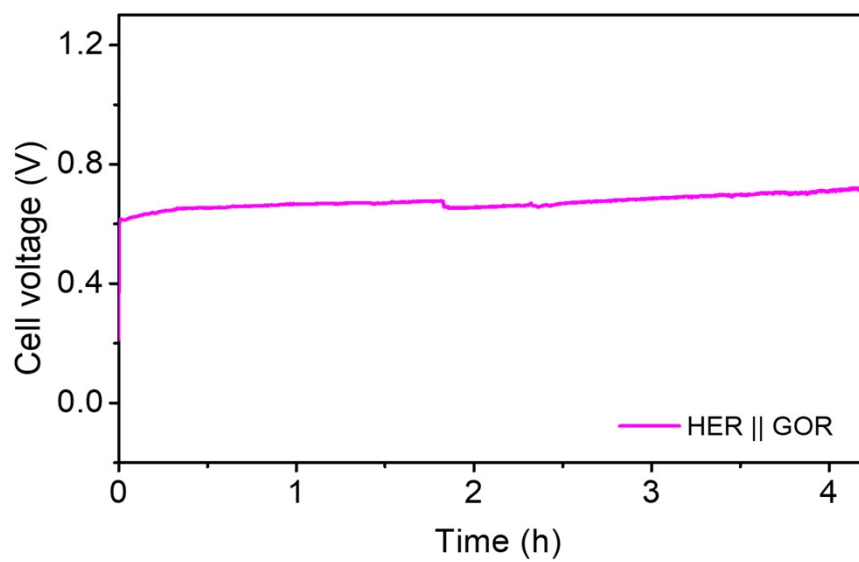

211

212 **Fig. S28.** The chronopotentiometry curve at  $10 \text{ mA cm}^{-2}$  for coupled HER and GOR with symmetric electrodes using RhNi  
213 NCs || RhNi NCs catalysts.

214

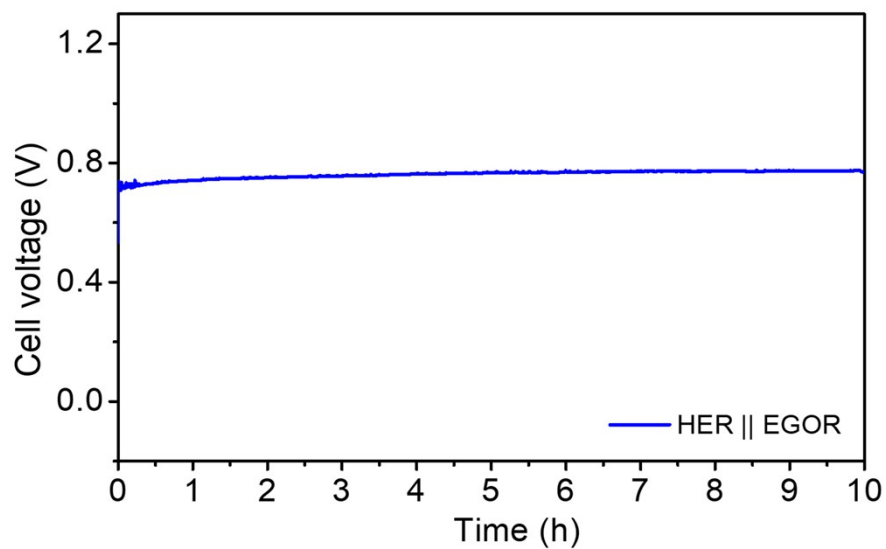

215

216 **Fig. S29.** The chronopotentiometry curve at  $10 \text{ mA cm}^{-2}$  for coupled HER and EGOR with symmetric electrodes using RhNi  
217 NCs || RhNi NCs catalysts.

218

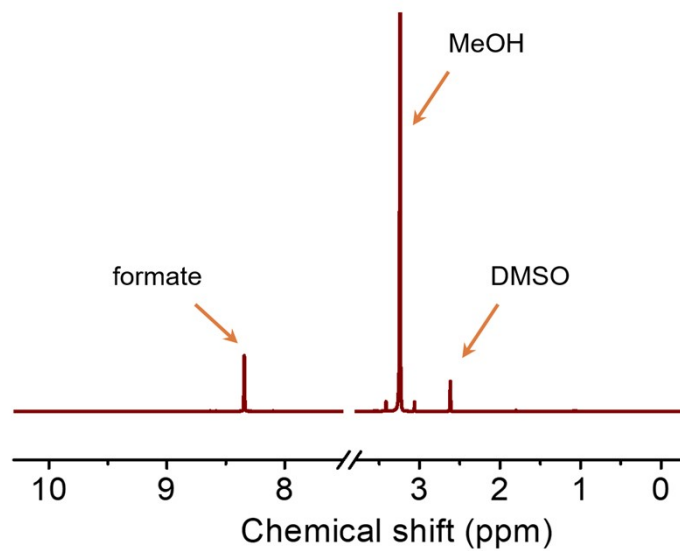

219

220 **Fig. S30.**  $^1\text{H}$  NMR spectra of the anodic electrolyte after a 10-hour amperometric i-t test of HER || MOR on RhNi NCs  
221 electrode.

222

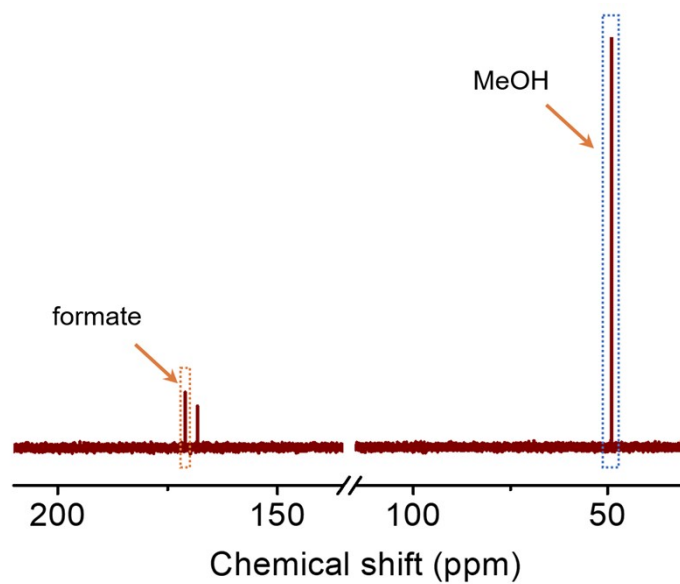

223

224 **Fig. S31.**  $^{13}\text{C}$  NMR spectra of the anodic electrolyte after a 10-hour amperometric i-t test of HER || MOR on RhNi NCs  
225 electrode.

226

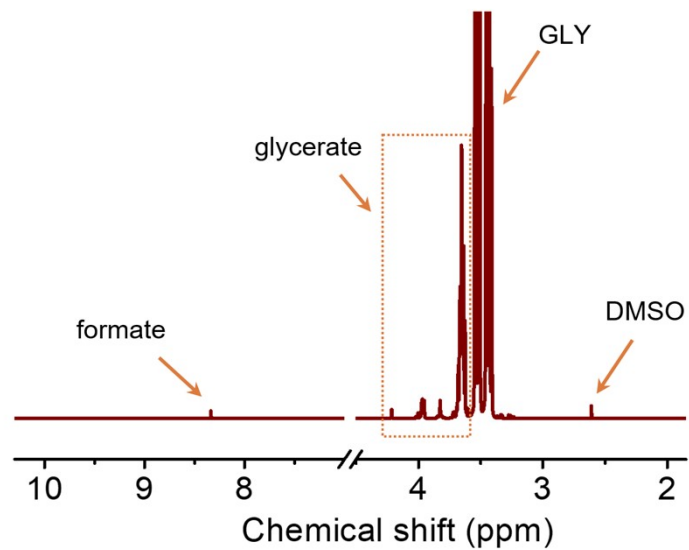

227

228 **Fig. S32.**  $^1\text{H}$  NMR spectra of the anodic electrolyte after a 10-hour amperometric i-t test of HER || GOR on RhNi NCs  
229 electrode.

230

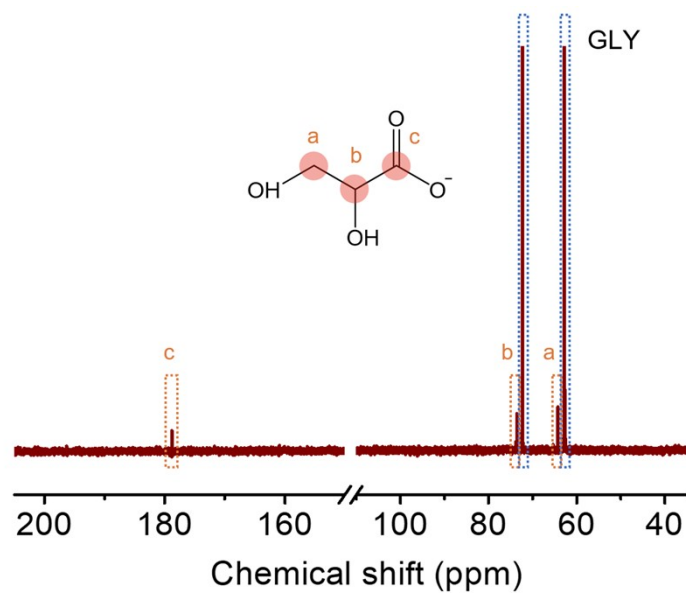

231

232 **Fig. S33.** <sup>13</sup>C NMR spectra of the anodic electrolyte after a 10-hour amperometric i-t test of HER || GOR on RhNi NCs  
 233 electrode.

234

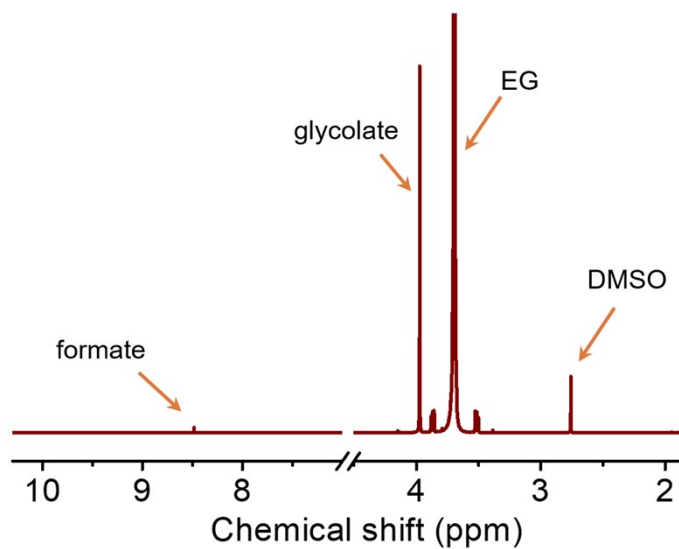

235

236 **Fig. S34.**  $^1\text{H}$  NMR spectra of the anodic electrolyte after a 10-hour amperometric i-t test of HER || EGOR on RhNi NCs  
237 electrode.

238

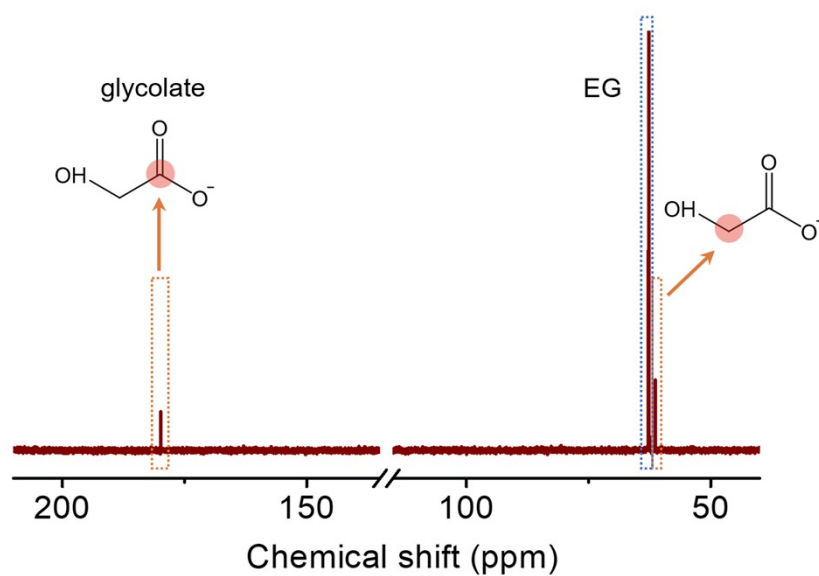

**Fig. S35.**  $^{13}\text{C}$  NMR spectra of the anodic electrolyte after a 10-hour amperometric i-t test of HER || EGOR on RhNi NCs electrode.



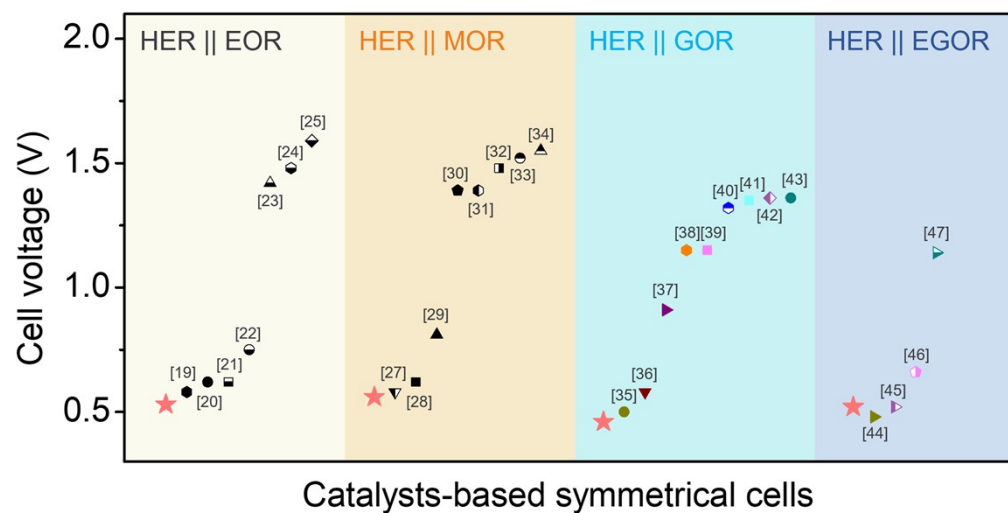

**Fig. S36.** Activity comparison of catalysts for energy-saving H<sub>2</sub> production at 10 mA cm<sup>-2</sup>.

246 **Table S1.** Summary of the ECSAs, loading, specific activities, and mass activities at peak potential for Rh-based catalysts.

| Catalysts | ECSA<br>(cm <sup>2</sup> ) | Loading<br>(μg <sub>Rh</sub> cm <sup>-2</sup> ) | Specific activity<br>@ peak potential<br>(mA cm <sup>-2</sup> <sub>(ECSA)</sub> ) | Mass activity<br>@ peak potential<br>(mA mg <sub>Rh</sub> <sup>-1</sup> ) |
|-----------|----------------------------|-------------------------------------------------|-----------------------------------------------------------------------------------|---------------------------------------------------------------------------|
| RhNi NCs  | 2.19                       | 7.3                                             | 0.78                                                                              | 928.1                                                                     |
| RhNi NSs  | 1.98                       | 7.6                                             | 0.66                                                                              | 696.8                                                                     |
| Rh NPs    | 2.28                       | 11.2                                            | 0.41                                                                              | 408.5                                                                     |

247

248

249 **Table S2.** Comparison of activity of noble-metal-based catalysts for HER in alkaline electrolyte.

| Catalysts                                                                    | Electrolytes | Overpotentials of HER<br>@ 10 mA cm <sup>-2</sup> | References |
|------------------------------------------------------------------------------|--------------|---------------------------------------------------|------------|
| RhNi NCs                                                                     | 1.0 M KOH    | 26 mV                                             | This work  |
| RhNi NSs                                                                     | 1.0 M KOH    | 37 mV                                             | This work  |
| Ni <sub>3</sub> Sn <sub>2</sub> -NiSnO <sub>x</sub> -2                       | 1.0 M KOH    | 14 mV                                             | [6]        |
| RhOOH NSs/C-OH-40                                                            | 1.0 M KOH    | 18 mV                                             | [7]        |
| Pt-AC/Cr-N-C                                                                 | 1.0 M KOH    | 19 mV                                             | [8]        |
| RhP <sub>2</sub> /Rh@NPG                                                     | 1.0 M KOH    | 21 mV                                             | [9]        |
| O-NiCu                                                                       | 1.0 M KOH    | 23 mV                                             | [10]       |
| Rh <sub>2</sub> P CNs                                                        | 1.0 M KOH    | 23 mV                                             | [11]       |
| Cu-doped Ru/RuSe <sub>2</sub> NSs/C                                          | 1.0 M KOH    | 29 mV                                             | [12]       |
| Pt-doped Rh metallene                                                        | 1.0 M KOH    | 37 mV                                             | [13]       |
| Ni <sub>x</sub> Rh <sub>1-x</sub> @200 °C                                    | 1.0 M NaOH   | 37 mV                                             | [14]       |
| Ni@IrNi                                                                      | 1.0 M KOH    | 33 mV                                             | [15]       |
| SA In-Pt NWs/C                                                               | 1.0 M KOH    | 46 mV                                             | [16]       |
| RhP <sub>x</sub> @NPC                                                        | 1.0 M KOH    | 69 mV                                             | [17]       |
| 8.2% Rh-MoSe <sub>2</sub>                                                    | 1.0 M KOH    | 73 mV                                             | [18]       |
| PtCu NF/C                                                                    | 1.0 M KOH    | 76 mV                                             | [19]       |
| RhSe <sub>2</sub>                                                            | 1.0 M KOH    | 82 mV                                             | [20]       |
| NMS/CC with Ni <sub>3</sub> S <sub>2</sub> /MoS <sub>2</sub> heterostructure | 1.0 M KOH    | 146 mV                                            | [21]       |

250

251

252 **Table S3.** Comparison of voltage needed for energy-saving H<sub>2</sub> production of RhNi NCs with other recently reported  
 253 electrocatalysts at 10 mA cm<sup>-2</sup>.

| Catalysts                                                                   | Electrolytes                                                    | Voltages of HER/EOR<br>@ 10 mA cm <sup>-2</sup> | References |
|-----------------------------------------------------------------------------|-----------------------------------------------------------------|-------------------------------------------------|------------|
| RhNi NCs                                                                    | 1.0 M KOH    (1.0 M KOH + 1.0 M EtOH)                           | 0.53 V                                          | This work  |
|                                                                             | 1.0 M KOH    (1.0 M KOH + 1.0 M MeOH)                           | 0.58 V                                          | This work  |
|                                                                             | 1.0 M KOH    (1.0 M KOH + 1.0 M GLY)                            | 0.46 V                                          | This work  |
|                                                                             | 1.0 M KOH    (1.0 M KOH + 1.0 M EG)                             | 0.52 V                                          | This work  |
| PtCu NF/C                                                                   | 1.0 M KOH    (1.0 M KOH + 0.5 M EtOH)                           | 0.58 V                                          | [19]       |
| SA In-Pt NWs/C                                                              | 1.0 M KOH    (1.0 M KOH + 0.5 M EtOH)                           | 0.62 V                                          | [16]       |
| Pd <sub>2</sub> Ga/C                                                        | 0.5 M KOH + 0.5 M EtOH                                          | 0.62 V                                          | [22]       |
| Pd <sub>3</sub> Pb@2.9%Pt                                                   | 1.0 M KOH + 1.0 M EtOH                                          | 0.75 V                                          | [23]       |
| RhNiFe-P NF                                                                 | 1.0 M KOH + 0.5 M EtOH                                          | 1.42 V                                          | [24]       |
| Co <sub>3</sub> S <sub>4</sub> -NSs/Ni-F                                    | 1.0 M KOH + 0.5 M EtOH                                          | 1.48 V                                          | [25]       |
| CuCo <sub>2</sub> S <sub>4</sub> /CC                                        | 1.0 M KOH + 1.0 M EtOH                                          | 1.59 V                                          | [26]       |
| Ni–MoN/NF-6                                                                 | 0.5 M H <sub>2</sub> SO <sub>4</sub>    1.0 M KOH + 0.5 M MeOH  | 0.56 V                                          | [27]       |
| Pt/MoSe <sub>2</sub> @MHCS                                                  | 0.5 M H <sub>2</sub> SO <sub>4</sub> + 1.0 M MeOH               | 0.62 V                                          | [28]       |
| Pd@Rh <sub>0.07</sub> Pd NDs                                                | 1.0 M KOH    (1.0 M KOH + 0.5 M MeOH)                           | 0.81 V                                          | [29]       |
| NiIr-MOF/NF                                                                 | 1.0 M KOH    (1.0 M KOH + 4.0 M MeOH)                           | 1.39 V                                          | [30]       |
| Co(OH) <sub>2</sub> @HOS/CP                                                 | 1.0 M KOH + 3.0 M MeOH                                          | 1.39 V                                          | [31]       |
| Ni <sub>50</sub> Co <sub>15</sub> Fe <sub>30</sub> Cu <sub>5</sub><br>MEAAs | 1.0 M KOH + 1.0 M MeOH                                          | 1.48 V                                          | [32]       |
| Ni(OH) <sub>2</sub> /NF                                                     | 1.0 M KOH + 0.5 M MeOH                                          | 1.52 V                                          | [33]       |
| Co-Rh <sub>2</sub>                                                          | 1.0 M KOH    (1.0 M KOH + 1.0 M MeOH)                           | 1.55 V                                          | [34]       |
| (CoNiCuMnMo)Se/CF                                                           | 0.5 M H <sub>2</sub> SO <sub>4</sub>    (1.0 M KOH + 0.1 M GLY) | 0.50 V                                          | [35]       |
| CoNiCuMnMo-<br>NPs/CC                                                       | 0.5 M H <sub>2</sub> SO <sub>4</sub>    (1.0 M KOH + 0.1 M GLY) | ~ 0.58 V                                        | [36]       |
| CuO@Co-MOF                                                                  | 1.0 M KOH    (1.0 M KOH + 0.1 M GLY)                            | ~ 0.91 V                                        | [37]       |
| CuO/CF                                                                      | 1.0 M KOH    (1.0 M KOH + 0.1 M GLY)                            | ~ 1.15 V                                        | [38]       |
| NiCo <sub>2</sub> O <sub>4</sub> /NF                                        | 1.0 M KOH + 0.1 M GLY                                           | 1.15 V                                          | [39]       |

(Continued)

254  
255

| Catalysts                  | Electrolytes                                       | Voltages of HER/EOR<br>@ 10 mA cm <sup>-2</sup> | References |
|----------------------------|----------------------------------------------------|-------------------------------------------------|------------|
| Mn-Co-S/NF                 | 1.0 M KOH + 0.3 M GLY                              | ~ 1.32 V                                        | [40]       |
| NiVRu-LDHs<br>NAs/NF       | 1.0 M KOH    (1.0 M KOH + 0.1 M GLY)               | 1.35 V                                          | [41]       |
| MnO <sub>2</sub> /CP       | 0.005 M H <sub>2</sub> SO <sub>4</sub> + 0.2 M GLY | 1.36 V                                          | [42]       |
| RuCu-CAT/CF                | 1.0 M KOH    (1.0 M KOH + 0.5 M GLY)               | 1.36 V                                          | [43]       |
| Pt-Ni(OH) <sub>2</sub> /NF | 1.0 M KOH    (1.0 M KOH + 0.1 M EG)                | ~ 0.48 V                                        | [44]       |
| Pd-Ni(OH) <sub>2</sub> /NF | 1 M KOH + 1.0 M EG                                 | 0.52 V                                          | [45]       |
| Rh/RhOOH metallene         | 1.0 M KOH + 6.0 M EG                               | ~ 0.66 V                                        | [46]       |
| Ru/Ni <sub>2</sub> P/NF    | 1 M KOH + 0.5 M EG                                 | 1.14 V                                          | [47]       |

- 257 [1] J. P. Perdew, K. Burke and M. Ernzerhof, *Phys. Rev. Lett.*, 1996, **77**, 3865–3868.
- 258 [2] G. Kresse and J. Hafner, *Phys. Rev. B*, 1993, **48**, 13115–13118.
- 259 [3] G. Kresse and D. Joubert, *Phys. Rev. B*, 1999, **59**, 1758–1775.
- 260 [4] P. E. Blöchl, *Phys. Rev. B*, 1994, **50**, 17953–17979.
- 261 [5] G. Mills, H. Jónsson and G. K. Schenter, *Surf. Sci.*, 1995, **324**, 305–337.
- 262 [6] X. M. Wang, G. F. Long, B. Liu, Z. L. Li, W. S. Gao, P. F. Zhang, H. Zhang, X. Zhou, R. Z. Duan, W. Hu and C. Li,
- 263 *Angew. Chem. Int. Ed.*, 2023, **62**, e202301562.
- 264 [7] S. X. Bai, M. Xie, T. Cheng, K. L. Cao, Y. Xu and X. Q. Huang, *Nano Energy*, 2020, **78**, 105224.
- 265 [8] L. Y. Zeng, Z. L. Zhao, Q. Z. Huang, C. H. Zhou, W. X. Chen, K. Wang, M. G. Li, F. X. Lin, H. Luo, Y. Gu, L. Li, S. P.
- 266 Zhang, F. Lv, G. Lu, M. C. Luo and S. J. Guo, *J. Am. Chem. Soc.*, 2023, **145**, 21432–21441.
- 267 [9] Y. H. Liu, J. Ding, F. H. Li, X. Z. Su, Q. T. Zhang, G. J. Guan, F. X. Hu, J. C. Zhang, Q. L. Wang, Y. C. Jiang, B. Liu
- 268 and H. B. Yang, *Adv. Mater.*, 2023, **35**, 2207114.
- 269 [10] J. S. Wang, S. S. Xin, Y. Xiao, Z. F. Zhang, Z. M. Li, W. Zhang, C. J. Li, R. Bao, J. Peng, J. H. Yi and S. L. Chou,
- 270 *Angew. Chem. Int. Ed.*, 2022, **61**, e202202518.
- 271 [11] S. F. Yang, X. B. Yang, Q. Wang, X. Q. Cui, H. B. Zou, X. L. Tong and N. J. Yang, *Chem. Eng. J.*, 2022, **449**, 137790.
- 272 [12] K. Wang, J. H. Zhou, M. Z. Sun, F. X. Lin, B. L. Huang, F. Lv, L. Y. Zeng, Q. H. Zhang, L. Gu, M. C. Luo and S. J.
- 273 Guo, *Adv. Mater.*, 2023, **35**, 2300980.
- 274 [13] Q. Q. Mao, W. X. Wang, K. Deng, H. J. Yu, Z. Q. Wang, Y. Xu, X. N. Li, L. Wang and H. J. Wang, *J. Energy Chem.*,
- 275 2023, **85**, 58–66.
- 276 [14] D. Jin, A. Yu, Y. Lee, M. H. Kim and C. Lee, *J. Mater. Chem. A*, 2020, **8**, 8629–8637.
- 277 [15] J. Xu, X. Y. Wang, X. N. Mao, K. Feng, J. B. Xu, J. Zhong, L. Wang, N. Han and Y. G. Li, *Energy Environ. Sci.*, 2023,
- 278 **16**, 6120–6126.
- 279 [16] Y. M. Zhu, X. R. Zhu, L. Z. Bu, Q. S. Y. F. Li, Z. W. Hu, C.-T. Chen, C.-W. Pao, S. Z. Yang and X. Q. Huang, *Adv.*
- 280 *Funct. Mater.*, 2020, **30**, 2004310.
- 281 [17] J.-Q. Chi, X.-J. Zeng, X. Shang, B. Dong, Y.-M. Chai, C.-G. Liu, M. Marin and Y. D. Yin, *Adv. Funct. Mater.*, 2019,
- 282 **29**, 1901790.
- 283 [18] Y. M. Zhao, C. L. Yang, G. X. Mao, J. Su, G. Z. Cheng and W. Luo, *Inorg. Chem. Front.*, 2018, **5**, 2978–2984.
- 284 [19] H. Fu, N. Zhang, F. L. Lai, L. S. Zhang, S. L. Chen, H. J. Li, K. Z. Jiang, T. Zhu, F. P. Xu and T. X. Liu, *ACS Catal.*,
- 285 2022, **12**, 11402–11411.
- 286 [20] W. W. Zhong, B. B. Xiao, Z. P. Lin, Z. P. Wang, L. G. Huang, S. J. Shen, Q. H. Zhang and L. G. , *Adv. Mater.*, 2021, **33**,
- 287 2007894.
- 288 [21] L. Y. Zhang, Y. J. Zheng, J. C. Wang, Y. Geng, B. Zhang, J. J. He, J. M. Xue, T. Frauenheim and M. Li, *Small*, 2021,
- 289 **17**, 2006730.
- 290 [22] Q. X. Wang, J. F. Liu, T. Li, T. Zhang, J. Arbiolb, S. X. Yan, Y. Wang, H. M. Li and A. Cabot, *Chem. Eng. J.*, 2022,
- 291 **446**, 136878.
- 292 [23] T. Li, Q. X. Wang, J. J. Wu, Y. P. Sui, P. Y. Tang, H. T. Liu, W. J. Zhang, H. M. Li, Y. Wang, A. Cabot and J. F. Liu,
- 293 *Small*, 2023, **20**, 2306178.
- 294 [24] J. Miao, X. J. Zhao, H.-Y. Hu, H. Huang, Y. Ding, Z.-H. Liu and Y. Chen, *ACS Appl. Nano Mater.*, 2022, **5**, 4948–4957.
- 295 [25] Y. Ding, Q. Xue, Q.-L. Hong, F.-M. Li, Y.-C. Jiang, S.-N. Li and Y. Chen, *ACS Appl. Mater. Interfaces*, 2021, **13**,
- 296 4026–4033.
- 297 [26] S. Sheng, K. Ye, Y. Y. Gao, K. Zhu, J. Yan, G. L. Wang and D. X. Cao, *J. Colloid Interface Sci.*, 2021, **602**, 325–333.
- 298 [27] C. M. Rao, H. J. Wang, K. Chen, H. Y. Chen, S. Q. Ci, Q. H. Xu and Z. H. Wen, *Small*, 2024, **20**, 2303300.
- 299 [28] F. L. Yang, W. Qiao, L. C. Yu, S. L. Wang and L. G. Feng, *Chem. Eng. J.*, 2024, **483**, 149055.
- 300 [29] Y.-C. Jiang, H.-Y. Sun, Y.-N. Li, J.-W. He, Q. Xue, X. L. Tian, F.-M. Li, S.-B. Yin, D.-S. Li and Y. Chen, *ACS Appl.*

301 *Mater. Interfaces*, 2021, **13**, 35767–35776.

302 [30] Y. Xu, M. Y. Liu, M. Z. Wang, T. L. Ren, K. L. Ren, Z. Q. Wang, X. N. Li, L. Wang and H. J. Wang, *Appl. Catal., B*,

303 2022, **300**, 120753.

304 [31] K. Xiang, D. Wu, X. H. Deng, M. Li, S. Y. Chen, P. P. Hao, X. F. Guo, J.-L. Luo and X.-Z. Fu, *Adv. Funct. Mater.*,

305 2020, **30**, 1909610.

306 [32] G. H. Han, M. G. Li, H. Liu, W. Y. Zhang, L. He, F. Y. Tian, Y. Q. Liu, Y. S. Yu, W. W. Yang and S. J. Guo, *Adv.*

307 *Mater.*, 2022, **34**, 2202943.

308 [33] J. Hao, J. W. Liu, D. Wu, M. X. Chen, Y. Liang, Q. Wang, L. Wang, X.-Z. Fu and J.-L. Luo, *Appl. Catal., B*, 2021, **281**,

309 119510.

310 [34] Y. Guo, X. B. Yang, X. C. Liu, X. L. Tong and N. J. Yang, *Adv. Funct. Mater.*, 2023, **33**, 2209134.

311 [35] H. Yao, Y. B. Wang, Y. N. Zheng, X. Yu, J. J. Ge, Y. H. Zhu and X. H. Guo, *Nano Res.*, 2023, **16**, 10832–10839.

312 [36] L. F. Fan, Y. X. Ji, G. X. Wang, J. X. Chen, K. Chen, X. Liu and Z. H. Wen, *J. Am. Chem. Soc.*, 2022, **144**, 7224–7235.

313 [37] Z. F. Zhao, X. Y. Shen, X. Y. Luo, M. H. Chen, M. D. Zhang, R. P. Yu, R. T. Jin and H. J. Zheng, *Adv. Energy Mater.*,

314 2024, **14**, 2400851.

315 [38] R.-Y. Fan, X.-J. Zhai, W.-Z. Qiao, Y.-S. Zhang, N. Yu, N. Xu, Q.-X. Lv, Y.-M. Chai and B. Dong, *Nano-Micro Lett.*,

316 2023, **15**, 190.

317 [39] W. S. Luo, H. Tian, Q. Li, G. Meng, Z. W. Chang, C. Chen, R. X. Shen, X. Yu, L. B. Zhu, F. T. Kong, X. Z. Cui and J.

318 L. Shi, *Adv. Funct. Mater.*, 2024, **34**, 2306995.

319 [40] Y. Fang, C. F. Dai, X. Y. Liu, Y. X. Wang, C. Ju, S. J. He, R. Shi, Y. N. Liu, J. G. Zhang, Y. F. Zhu and J. Wang, *Nano*

320 *Energy*, 2024, **127**, 109754.

321 [41] Q. Z. Qian, X. Y. He, Z. Y. Li, Y. X. Chen, Y. F. Feng, M. Y. Cheng, H. K. Zhang, W. T. Wang, C. Xiao, G. Q. Zhang

322 and Y. Xie, *Adv. Mater.*, 2023, **35**, 2300935.

323 [42] Y. Li, X. F. Wei, S. H. Han, L. S. Chen and J. L. Shi, *Angew. Chem., Int. Ed.*, 2021, **60**, 21464–21472.

324 [43] Y. Q. He, Z. Ma, F. Yan, C. L. Zhu, T. Y. Shen, S. L. Chou, X. Zhang and Y. J. Chen, *PNAS*, 2024, **121**, e2320777121.

325 [44] X. Liu, X. Y. He, D. K. Xiong, G. Y. Wang, Z. T. Tu, D. L. Wu, J. Y. Wang, J. Gu and Z. F. Chen, *ACS Catal.*, 2024,

326 **14**, 5366–5376.

327 [45] F. L. Liu, X. T. Gao, R. Shi, Z. X. Guo, E. C. M. Tse and Y. Chen, *Angew. Chem., Int. Ed.*, 2023, **62**, e202300094.

328 [46] Q. Q. Mao, K. Deng, H. J. Yu, Y. Xu, Z. Q. Wang, X. N. Li, L. Wang and H. J. Wang, *Adv. Funct. Mater.*, 2022, **32**,

329 2201081.

330 [47] G. Ma, N. Yang, Y. F. Xue, G. F. Zhou and X. Wang, *ACS Appl. Mater. Interfaces*, 2021, **13**, 42763–42772.
